# *Citius, Fortius?* Cohort, inflammation and trajectories of gait speed and grip strength in older Britons

Gindo Tampubolon<sup>1</sup>

Maria Fajarini<sup>2</sup>

**1 Manchester Institute for Collaborative Research on Ageing  
University of Manchester**

**2 Evidence & Analytics, Manchester**

\* [tampubolon@manchester.ac.uk](mailto:tampubolon@manchester.ac.uk)

## **Abstract**

Although the cost of long term care of physical disabilities is considerable, little is known about individual trajectories of physical function (measured by gait speed and grip strength) that preceded the process of disablement. Moreover, studies on trajectories of health function have often ignored cohort composition, precluding evidence of secular improvement. And few have explored the role of chronic inflammation on older people's physical function trajectories. Using the English Longitudinal Study of Ageing 2004 – 2013 we derived trajectories of gait speed and grip strength of Britons aged  $\geq 50$  years and investigated the effect of inflammation. Then we drew

trajectories for different cohorts to seek evidence of secular improvement. We uncovered a complex gradient of improvement in trajectories of physical function that depends on sex and maximum versus normal capacity. In conclusion, accounting for the cohort composition of older people can materially modify the future cost of long term care. Keywords: English Longitudinal Study of Ageing; gait speed; grip strength; inflammation; C-reactive protein; fibrinogen; attrition; weighting

## Introduction

Olympians are not the only group attaining secular improvement over recent decades. The most recent cohort of older people have also showed higher levels of cognitive function [1]. The Post-War cohort, compared to the earlier cohorts, maintained higher episodic memory at similar ages. Given the myriad connections between cognitive and physical functions [2], this evidence raises a possibility that the more recent cohort of older people also maintain an advantaged trajectory of physical function. We interpret inter-cohort (for instance from War cohort to Post-War cohort) increase in functioning as evidence of secular improvement [3].

We tested this possibility by using gait speed and grip strength as two well-characterised measures of physical function [4–6], especially since grip strength has been shown to predict disability, morbidity, and mortality [7, 8].

Such a possibility can have theoretical and practical implications. Cohort has always been an important concept waiting to take its place in our scheme of understanding individual change over an extended period of later life ( $\geq 50$  years). Cohort in our sense is not primarily defined

chronologically. Instead it refers to a time course or an era defined by socio-historical events, e.g. War vs. Post-War cohort or Pre-Depression era vs. Depression era cohort. But it has rarely been treated as an integral part, as if by later life age has chiseled off any cohort difference that might matter.

However, recent scholarship has questioned this age-as-leveller assumption. Birth cohort, as a marker for a childhood stage exposed to similar kinds of developmental hazards and damage (cf. the War cohort versus the Post-War cohort), can give insight into how later life experience might unfold. For example, in the English Longitudinal Study of Ageing (ELSA), childhood condition at age ten has been found to exert a very long influence indeed. Those who were poor financially in their first decade of life displayed slower gait, poorer memory, and more depression in their fifth to ninth decades of life [5]. Because the evidence is based on cross-sectional observations, the study cannot distinguish cohort effect from age trajectory effect. It remains a distinct possibility that a net cohort effect yields insight on how an early stage in life course shapes health outcomes and wellbeing throughout later life.

The implications are not merely theoretical [9]. In practice, cohort effect can have a bearing on policy to support and care for older population, a growing and important demographic. For example, two British regions with the same number of people aged  $\geq 50$  years but different cohort composition are likely to yield different evolution of demand for health and social care. To put a figure on the stake, the Swedish and Dutch governments spent 3.5% of their gross domestic products on long term care of older people with disabilities, including physical disabilities (WHO

World Report on Ageing and Health) [10]. Apart from the difference in 45  
their health systems, difference in cohort composition across the two 46  
countries can impact future trends of these percentages. 47

The WHO World Report also emphasised the need for refined pictures 48  
of changes in physical function of individuals in later life. This calls for 49  
deriving, based on the experience of older people living in communities or 50  
outside institutions, age trajectories of physical function over an extended 51  
period. 52

One note of caution follows when deriving such trajectories. Collecting 53  
repeated measures from older people inevitably faces attrition problems, 54  
since older people tend to attrite non-randomly in subsequent visits [11, 12]. 55  
Recently, a number of solutions have been proposed including weighting 56  
and joint modelling [1, 13, 14]; inverse proportional to attrition weighting is 57  
applied here. 58

While recent studies on cognitive function and well-being showing cohort 59  
improvement have prompted the question on cohort effect [1, 13], another 60  
recent study on blood-based biomarkers of cognitive deficits [15] have 61  
suggested another insight. The study showed that inflammation, measured 62  
using two inflammatory markers of high sensitivity C-reactive protein 63  
(CRP) and fibrinogen, is associated with cognitive deficits. So given the 64  
connections between cognitive and physical functions [2], inflammation can 65  
be expected to have an effect on physical function trajectories throughout 66  
later life as well [16]. This can enrich our understanding of key drivers of 67  
healthy ageing that affect multiple dimensions of health functions. 68

We therefore aimed to gauge whether there is a secular improvement to 69  
gait speed and grip strength enjoyed by some older people living today and 70

to quantify the effect of inflammation on the trajectories of physical 71  
function. We note that our aim was not to estimate causality, merely to 72  
explore important association hitherto neglected. To tie the strands 73  
together we raise three questions: What is the shape of age trajectories of 74  
physical function as measured by gait speed and grip strength? Do recent 75  
cohorts possess a more advantaged trajectory, one with higher levels at 76  
similar ages to the earlier cohorts? Is inflammation associated with lower 77  
levels of physical function? 78

## Materials and methods 79

The University of Manchester's institutional review board has exempted 80  
this study since it used publicly available anonymised secondary data for 81  
research. 82

The English Longitudinal Study of Ageing (ELSA) is the main resource 83  
for a nationally-representative ageing study of the English older population. 84  
The first wave was in 2002 and subsequent waves follow biennially. 85  
Repeated biomarker information is available from the even numbered 86  
waves (2004/5, 2008/9 and 2012/3) when nurses visited the participants. 87  
The data are freely available from the UK Data Archive 88  
([www.data-archive.ac.uk](http://www.data-archive.ac.uk)) as study number 5050. More details of the study 89  
are given elsewhere [14, 17–19]. 90

We used two measures of physical function that have been used in this 91  
sample [4, 5]. The first is gait speed at normal pace (m/s), timed by a 92  
research nurse, in m/s; the second is objectively measured maximum grip 93  
strength of the dominant hand (kg), obtained using a dynamometer 94  
(Smedley Dynamometer, Tokyo). The nurse demonstrated each test before 95

the participant was asked to do it. After adjusting the dynamometer to 96  
suit the participant's hand and positioning the participant correctly, the 97  
participant was asked to squeeze the dynamometer as hard as possible for 98  
a couple of seconds. Three values were recorded for each hand, starting 99  
with the non-dominant hand and alternating between hands. The 100  
maximum was used. Walking speed was measured by marking a course in 101  
a suitable space in the participant's home with a tape measure and placing 102  
masking tape at the starting and ending points. The length of the course 103  
was 244 cm. The nurse used a stopwatch to record the time. The 104  
participant was asked to complete two timed walks at normal pace. 105

Blood samples were collected by the research nurse in three waves and 106  
kept deep-frozen until analysis at the Newcastle NHS hospital laboratory. 107  
Plasma samples were analyzed for fibrinogen concentrations (in g/L) using 108  
an ACL TOP CTS analyzer. The samples were also analyzed for high 109  
sensitivity CRP concentrations (in mg/L), applying a particle-enhanced 110  
immunoturbidimetric assay, using Roche Modular P analyzer. Both have 111  
been used before [15]. Following the literature [15,20,21], we removed 112  
observations with CRP concentrations above 10 mg/L, indicating acute 113  
inflammation. Because CRP distribution is skewed, following the Women's 114  
Health Initiative Study and Established Populations for Epidemiologic 115  
Studies of the Elderly, we derived an indicator variable marking 116  
concentrations in the top quartile; similarly with fibrinogen [22–24]. We 117  
constructed four cohorts or birth groups marked by socio-historical events, 118  
to make them comparable to the US sister study (Health and Retirement 119  
Survey) and a previous study of this sample [1]. The four cohorts 120  
(requiring three cohort indicators) are pre-Depression cohort (born before 121

1930, omitted as the reference), Depression era cohort (1931–1938), War cohort (1939–1945) and post-War cohort (born after 1946). These four are more refined than the three cohorts used in the ELSA report [17, 25, 26].

Following the literature [4, 27] we built separate models for the sexes. We used mixed model to derive trajectories of both physical function measures; the model is variously known as latent growth curve model or random coefficients model. The dependent variables were gait speed and grip strength. The key covariates were cohort indicators, high CRP indicator, and high fibrinogen indicator. In applying mixed or random coefficients model, we estimated random intercepts, random slopes of age, and their covariance. As confounders we included, in addition to age and sex other covariates including wealth (in tertiles with the poorest third as reference), marital status (single, married or partnership, and others as reference) and socioeconomic positions earlier in the life course: education (threefold: less than high school as reference, high school, and college), and occupational class (threefold: routine manual as reference, intermediate, and managerial/professional). We also included height following similar studies in Europe and Britain [28–31]. We set an a priori  $\alpha = 0.05$ .

We retained in the analysis those with complete information on both physical function measures (gait speed and grip strength), both inflammatory markers (CRP and fibrinogen) and other covariates (as analytic sample). This resulted in  $N = 5,030$  at baseline, and 5,384 and 4,500 at subsequent waves. The analytic and reference samples were tested for difference using  $t$  test (continuous covariates) and  $\chi^2$  test (nominal covariates). At baseline, the analytic sample (compared to the reference sample) had relatively younger participants (66.0 [standard deviation/SD

9.1] vs 69.6 [SD 9.9]),  $t = 12.4, p < 0.001$ , lower CRP levels (2.6 [SD 2.3] 148  
vs 2.9 [SD 2.3]),  $t = 2.3, p = 0.020$ ), and lower fibrinogen levels (3.1 [SD 149  
0.6] vs 3.3 [SD 0.9],  $t = 3.5, p < 0.001$ ), higher gait speed (1.1 [SD 0.3] 150  
vs 1.0 [SD 0.4] m/s,  $t = 5.4, p < 0.001$ ), and stronger grip strength (29.7 151  
[SD 10.7] vs 28.2 [SD 10.8] kg,  $t = 2.4, p = 0.015$ ). Both samples had a 152  
higher proportion of women to men (analytic sample: 0.53, SD 0.49; 153  
reference sample: 0.56, SD 0.49) but there was no significant difference 154  
between the samples  $\chi_1^2 = 2.2, p = 0.14$ . 155

Because the repeated observations had shrunk due to attrition, we 156  
followed the extensive literature in using inverse proportional to attrition 157  
weighting [32–35]. Particularly following [35], the attrition model included 158  
age, sex, smoking, cognition, education, hypertension, cardiovascular 159  
disease, diabetes, and retirement status; then stabilised weights were 160  
computed with base model including age, sex, and education. All 161  
modelling was done in Latent GOLD Syntax 5.1 [36]. 162

## Results 163

Women made up the majority of the sample (8,142; 54.6%) while the 164  
average gait speed at normal pace was 1.1 m/s (standard deviation [SD] 165  
0.4 m/s), of maximum grip strength was 29.5 kg (SD 11.5 kg), and of age 166  
was 66.4 year (SD 8.9 yr); see Table 1. 167

To gauge cohort effect initially, we computed proportions for all cohorts 168  
of people who were physically impaired based on thresholds recently 169  
established for the British population, i.e. 1.5 standard deviation below 170  
the mean (sex and yearly-age standardised) [4]. The cross-cohort 171  
proportions in Table 2 present, with a slight tapering off, a gradient of 172



| Variable               | mean or <i>N</i> | Std. Dev. or % |
|------------------------|------------------|----------------|
| Gait speed             | 1.1              | 0.4            |
| Grip strength          | 29.5             | 11.5           |
| CRP                    | 2.5              | 2.3            |
| Fibrinogen             | 3.1              | 0.6            |
| Age, year              | 66.4             | 8.9            |
| Men                    | 6,772            | 45.4           |
| Women                  | 8,142            | 54.6           |
| Marital status         |                  |                |
| Single                 | 830              | 5.6            |
| Married                | 10,272           | 68.9           |
| Separated/widowed*     | 3,812            | 25.6           |
| Social class           |                  |                |
| Managerial             | 5,882            | 39.4           |
| Intermediate           | 3,544            | 23.8           |
| Routine manual*        | 5,488            | 36.8           |
| Wealth                 |                  |                |
| Poorest*               | 4,198            | 28.2           |
| Middle                 | 5,139            | 34.51          |
| Wealthiest             | 5,577            | 37.4           |
| Education              |                  |                |
| Less than high school* | 4,619            | 30.9           |
| High school            | 5,737            | 38.5           |
| Some college           | 4,558            | 30.6           |

**Table 1.** Description of analytic sample with reference categories in asterisks. Source: ELSA 2004-2013.

improvement as shown in reduction in impairment across cohort. Nearly 173  
 4.5% of Pre-Depression cohort members were impaired compared to only 174  
 2.4% of the Post-War cohort members. 175

To gain better insights we included other covariates in models of 176  
 physical function. Model fit statistics, presented in Table 3, suggest that, 177  
 as with Danish data [29], non-linear age trajectories fit the data best 178  
 (smallest BIC and largest  $R^2$ ). Subsequent presentation relies on these four 179  
 models (two outcomes for both sexes) with age and squared age terms. 180

The coefficients of the best models for gait speed are given in Table 4 181  
 and for grip strength in Table 5. Table 4 showed that there is no difference 182

| Cohort            | Impaired |       |
|-------------------|----------|-------|
|                   | Yes      | No    |
| Pre-Depression    | 4.45     | 95.55 |
| Depression cohort | 3.17     | 96.83 |
| War cohort        | 2.19     | 97.81 |
| Post-War          | 2.36     | 97.64 |
| Total             | 2.77     | 97.23 |

**Table 2.** Proportion of physically impaired older people in each cohort based on British population reference values. Source: ELSA 2004-2013.

|       |               | Age       |                | Age <sup>2</sup> |                |
|-------|---------------|-----------|----------------|------------------|----------------|
|       |               | BIC       | R <sup>2</sup> | BIC              | R <sup>2</sup> |
| Women | Gait speed    | 2121.794  | 0.434          | 1707.843         | 0.705          |
| Men   |               | 956.636   | 0.720          | 598.624          | 0.735          |
| Women | Grip strength | 55612.431 | 0.127          | 55612.656        | 0.569          |
| Men   |               | 47187.521 | 0.788          | 47185.125        | 0.789          |

**Table 3.** Model fit for gait speed and grip strength. Source: ELSA 2004 – 2013.

in gait speed at normal pace among those who were born during different 183  
times in the last century. Compared to those born before 1930 (the 184  
reference), men and women of the three subsequent cohorts of Depression 185  
era, War and Post-War cohorts walked no faster. Both sexes however 186  
showed similar reduction in gait speed with high levels of C-reactive 187  
protein: women by 0.023 m/s (95% confidence interval, CI: 0.037 – 188  
0.090m/s) and men by 0.027 (CI: 0.011 – 0.043 m/s). 189

Compared to the estimates for gait speed, those for maximum grip 190  
strength showed similarities and differences (Table 5). There is a 191  
discernible and different pattern of cohort effect. Men of the three 192  
subsequent cohorts displayed a step by step increase in maximum grip 193  
strength by about one kg per cohort, amounting to a cohort gradient or 194  
secular improvement. For the two most recent cohorts, this improvement is 195  
also highly statistically significant. There is also some similarity with the 196  
results on gait speed (Table 4) in the inverse association between 197

| Gait speed                                | Women  |       |         | Men    |       |         |
|-------------------------------------------|--------|-------|---------|--------|-------|---------|
|                                           | coef   | s.e.  | p       | coef   | s.e.  | p       |
| Constant                                  | 7.301  | 0.203 | < 0.001 | 7.241  | 0.216 | < 0.001 |
| Age                                       | -0.160 | 0.006 | < 0.001 | -0.158 | 0.007 | < 0.001 |
| Age2                                      | 0.098  | 0.005 | < 0.001 | 0.097  | 0.005 | < 0.001 |
| Cohort: Pre-Depression as reference       |        |       |         |        |       |         |
| Depression era                            | 0.021  | 0.021 | 0.31    | 0.016  | 0.023 | 0.47    |
| War                                       | -0.042 | 0.027 | 0.11    | -0.047 | 0.029 | 0.10    |
| Post-War                                  | 0.036  | 0.032 | 0.26    | 0.010  | 0.035 | 0.77    |
| Height                                    | -0.000 | 0.000 | 0.001   | -0.000 | 0.000 | 0.008   |
| Wealth: poorest third as ref.             |        |       |         |        |       |         |
| Middle                                    | 0.013  | 0.008 | 0.098   | 0.003  | 0.008 | 0.70    |
| Wealthiest                                | 0.042  | 0.008 | < 0.001 | 0.030  | 0.009 | < 0.001 |
| Education: primary school as ref.         |        |       |         |        |       |         |
| High school                               | 0.031  | 0.008 | < 0.001 | 0.039  | 0.009 | < 0.001 |
| College                                   | 0.039  | 0.011 | < 0.001 | 0.056  | 0.010 | < 0.001 |
| Occupation: routine manual as ref.        |        |       |         |        |       |         |
| Managerial                                | 0.028  | 0.010 | 0.003   | 0.024  | 0.008 | 0.003   |
| Intermed                                  | 0.016  | 0.008 | 0.047   | 0.015  | 0.012 | 0.22    |
| Marital status: separated/widowed as ref. |        |       |         |        |       |         |
| Single                                    | 0.006  | 0.016 | 0.71    | 0.002  | 0.015 | 0.90    |
| Married                                   | -0.000 | 0.007 | 1.00    | 0.012  | 0.009 | 0.22    |
| High CRP                                  | -0.023 | 0.007 | 0.002   | -0.027 | 0.008 | < 0.001 |
| High fibrinogen                           | -0.008 | 0.007 | 0.26    | -0.005 | 0.008 | 0.56    |
| $\sigma_{\text{int}}^2$                   | 0.025  | 0.028 | < 0.001 | -0.469 | 0.033 | < 0.001 |
| $\sigma_{\text{age}}^2$                   | 0.000  | 0.000 | 1.00    | 0.000  | 0.000 | 1.00    |
| $\sigma_{\text{int,age}}$                 | 0.001  | 0.000 | < 0.001 | 0.009  | 0.001 | < 0.001 |

**Table 4.** Age trajectories of gait speed among Britons aged 50 years and older. Source: ELSA 2004 – 2013

inflammation and grip strength. However, this time the significant marker 198  
is fibrinogen. High levels of fibrinogen are associated with more than half a 199  
kilogram reduction in grip strength (women: 545 gram, CI: 151 – 939 200  
gram; men: 710 gram, CI: 236 – 1,184 gram). 201

Other findings can be briefly summarised. Socioeconomic positions 202  
throughout the life course as indicated by wealth, occupation and 203  
education showed largely significant associations with both measures of 204  
physical function. Wealth (wealthiest and middle compared to the poorest 205

| Grip strength                             | Women  |        |         | Men    |       |         |
|-------------------------------------------|--------|--------|---------|--------|-------|---------|
|                                           | coef   | s.e.   | p       | coef   | s.e.  | p       |
| Constant                                  | 35.262 | 5.547  | < 0.001 | 32.747 | 7.397 | < 0.001 |
| Age                                       | -0.171 | 0.156  | 0.27    | 0.260  | 0.197 | 0.19    |
| Age2                                      | -0.082 | 0.114  | 0.47    | -0.467 | 0.140 | < 0.001 |
| Cohort: Pre-Depression as reference       |        |        |         |        |       |         |
| Depression era                            | 0.548  | 0.509  | 0.28    | 1.116  | 0.605 | 0.065   |
| War                                       | 0.173  | 0.675  | 0.80    | 2.481  | 0.840 | 0.003   |
| Post-War                                  | 0.194  | 0.857  | 0.82    | 3.153  | 1.110 | 0.005   |
| Height                                    | 0.011  | 0.004  | 0.002   | 0.020  | 0.004 | < 0.001 |
| Wealth: poorest third as ref.             |        |        |         |        |       |         |
| Middle                                    | 0.849  | 0.220  | < 0.001 | 1.176  | 0.260 | < 0.001 |
| Wealthiest                                | 1.143  | 0.240  | < 0.001 | 1.215  | 0.285 | < 0.001 |
| Education: primary school as ref.         |        |        |         |        |       |         |
| High school                               | 0.680  | 0.240  | 0.005   | 0.561  | 0.323 | 0.082   |
| College                                   | 1.292  | 0.323  | < 0.001 | 1.231  | 0.365 | < 0.001 |
| Occupation: routine manual as ref.        |        |        |         |        |       |         |
| Managerial                                | -0.458 | 0.293  | 0.12    | 0.219  | 0.298 | 0.46    |
| Intermed                                  | -0.805 | 0.245  | 0.001   | -0.373 | 0.443 | 0.40    |
| Marital status: separated/widowed as ref. |        |        |         |        |       |         |
| Single                                    | -1.263 | 0.467  | 0.007   | -1.067 | 0.550 | 0.052   |
| Married                                   | -0.321 | 0.217  | 0.14    | 0.903  | 0.315 | 0.004   |
| High CRP                                  | -0.237 | 0.205  | 0.25    | -0.126 | 0.250 | 0.61    |
| High fibrinogen                           | -0.545 | 0.201  | 0.007   | -0.710 | 0.242 | 0.003   |
| $\sigma_{\text{int}}^2$                   | 17.247 | 0.412  | < 0.001 | 16.553 | 1.940 | < 0.001 |
| $\sigma_{\text{age}}^2$                   | 0.025  | 0.004  | < 0.001 | 0.064  | 0.005 | < 0.001 |
| $\sigma_{\text{int,age}}^2$               | -0.028 | 10.000 | 1.00    | -0.185 | 0.034 | < 0.001 |

**Table 5.** Age trajectories of grip strength among Britons aged 50 years and older. Source: ELSA 2004 – 2013

third), occupation (managerial and intermediate compared to routine 206  
manual occupation), and education (college and high school compared to 207  
up to primary school leavers) have positive associations with both gait 208  
speed and grip strength, and are mostly statistically significant. A minor 209  
exception is noted where among women, intermediate occupation has a 210  
significantly negative coefficient compared to routine manual occupation. 211  
This may be due to more use of physical exertion in the routine manual 212  
occupation. 213

Finally, to illustrate the contributions of all covariates to grip strength, 214  
we plot predicted values of grip strength in Figure 1. We refrained from 215  
presenting an analogous plot for gait speed since cohort indicators were not 216  
found significant; and from commenting on the shapes of the trajectories in 217  
Figure 1, relying on fit statistics in Table 3 to decide on the best model. In 218  
Figure 3, the four cohorts of men, marked with (M), are above the four 219  
cohorts of women. Moreover, the War cohort (M) and the Post-War cohort 220  
(M) can be seen to be slightly above the older two cohorts (the Depression 221  
era cohort (M) and the Pre-Depression era cohort (M)). The statistical 222  
significance of the higher values should be gathered not from this figure 223  
but from Table 5, which suggest that the two most recent cohorts of men 224  
attained significantly higher values. In contrast, in the women's sample 225  
there was no discernible difference in the four plots (clustered at the lower 226  
part), consistent with the lack of statistical significance shown in Table 5. 227

## Discussion 228

The trend of physical disability in older people, with its cost implications, 229  
has been uncertain given the countervailing drivers of extending life 230  
expectancy and reduction in disability at a given age [10, 37]. Our analysis 231  
uncovered a secular improvement in physical function that is most 232  
pronounced among men born during and after the War. Unfortunately, no 233  
evidence of comparable gains accrued to women. 234

The data also revealed an intriguing pattern of improvement across 235  
physical function. The pattern is distinguished along normal capacity (gait 236  
speed at normal pace) versus maximum capacity (maximum grip strength). 237  
Among men, normal functional capacity did not show cross-cohort 238

Figure 1. Predicted grip strength based on the best models.  
Source: ELSA 2004 – 2013.

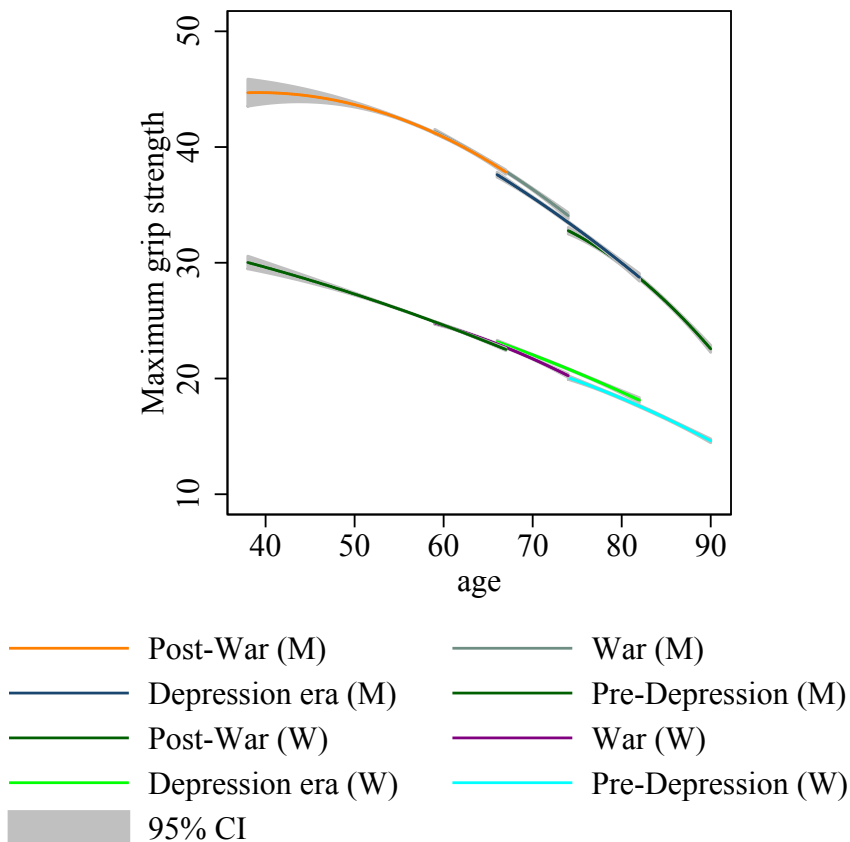

improvement at all but maximum capacity showed a secular improvement. 239  
The maximum force that muscles can physically muster when called forth 240  
has evidently increased across cohort considerably. This calls to mind that, 241  
in parallel, cognitive function in this sample has also been shown to 242  
improve across cohort [1]. This is the first evidence of a complex pattern of 243  
improvement in trajectories of physical function across cohort and sex. 244

The mechanism driving the cross-cohort improvement to health 245  
functioning has generally been ascribed to general improvement in public 246  
health infrastructure and education [5, 38, 39]. Improvements in public 247

health infrastructure from the early part of the last century meant that 248  
children grew up with better conditions and reduced hazards and damage 249  
to health and child development. Improvements in education up to tertiary 250  
levels meant that adults became better equipped to make use of the new 251  
information that was abundantly created and increasingly available 252  
through the parallel progress in science and medical technology. Although 253  
such developments have not resulted in uniform and secular improvement 254  
in physical function, in maximum grip strength they have. Therein also 255  
lies a potential resolution to the uncertain trends in physical disability, i.e. 256  
different aspects of physical function give different pictures but maximum 257  
grip strength shows secular improvement. 258

A ground for optimism is thus available based on secular improvement 259  
in maximum capacity among men. But as noted in the WHO World 260  
Report on Ageing and Health [10] the daily functioning of an older person 261  
crucially depends on the surrounding health system environments and on 262  
access to such systems. Two older persons of the same cohort with 263  
similarly low level of maximum capacity may fare and function differently 264  
depending on their access to assistive technology to compensate for the 265  
perceived gap. Nevertheless, given the secular improvement in both 266  
cognitive and physical functions among men, the more recent cohorts of 267  
the older population hold a double potential for continuing contribution 268  
that may not have been fully appreciated. 269

Inflammation, on the other hand, is largely harmful across both 270  
measures of health function. Although different markers are found to be 271  
significant for different measures, inflammation is inversely related to 272  
maximum and normal functional capacity. Thus high fibrinogen associates 273

with weaker grip while high CRP associates with slower gait. This gives 274  
some contrast to previous work on this sample. In a cross-section study of 275  
average grip strength, CRP has been found to be significant [40]. Our 276  
longitudinal study showed a similar sign but not significance. In 277  
comparison with a cross-sectional observation, longitudinal observations 278  
which were analysed with due control for attrition offer some advantage, 279  
particularly control for unobserved individual differences. 280

The inflammation effect echoes a finding based on this sample which 281  
showed inflammation to be harmful to cognitive function [15]. Evidently, 282  
inflammation also goes with reduced physical function, supporting the idea 283  
of inflammaging [41]. The mechanism for this revolves around the role of 284  
inflammatory cytokines in both muscle regeneration and muscle 285  
functioning. In normal activities of daily living which involve muscle 286  
exertion, some minute damage to muscle tissue may occur. In these 287  
circumstances, the pluripotent myosatellite cells respond by proliferating 288  
and differentiating to form muscle fibres and cover the damaged tissue. 289  
Circulating inflammatory cytokines such as tumour necrosis factor  $\alpha$  290  
(TNF $\alpha$ ) have been shown to impair this process of regeneration in two 291  
ways: apoptosis of myosatellite cells and inhibition of the differentiation 292  
stage, leaving proliferated cells unable to differentiate and replace the 293  
damaged tissue. Beyond impairing the myogenesis process in common 294  
minute damage, inflammation also impairs functioning by reducing the 295  
power of the single permeable fibre. So in mice, TNF $\alpha$  rapidly reduces the 296  
force generating capacity or specific tension of muscle fibres independent of 297  
loss of muscle volume. In short, inflammation impairs muscle functioning 298  
in older people in at least three ways: it encourages myosatellite cell 299



deaths, it interrupts the step of differentiation into myonuclei and muscle 300  
fibres; lastly, even if muscle fibres have been successfully regenerated, 301  
inflammation reduces the febrile tensile strength. 302

This study has a number of weaknesses. First, not all common measures 303  
of inflammatory cytokines were collected, especially  $TNF\alpha$ . Addressing 304  
this should help in strengthening the mechanism by securing close 305  
comparison between population studies and *in vitro* studies. Since muscle 306  
strength is determined to a large extent by muscle volume [42], a better 307  
measure of muscle volume using dual energy x-ray absorptiometry can 308  
additionally strengthen the basis for the mechanism underlying the 309  
observed improvement. Lastly, the complex result on cohort improvement, 310  
depending on aspects of physical function and sex, may be highly specific 311  
to the British experience. A cross-country comparison is an obvious next 312  
step. This study nonetheless has some strengths. First, the sample is 313  
designed to represent the country and not only some clinical groups or 314  
regions, hence facilitating generalisation. Moreover, this is the first study, 315  
based on repeated measures of both physical function and inflammation, to 316  
draw trajectories of physical function and factors that shaped them as they 317  
unfold with age. Finally, this study also derived the trajectories while 318  
dealing with the attrition that is common but often ignored in longitudinal 319  
ageing studies. 320

In conclusion, pronouncements about trends in healthy physical ageing 321  
are marked with inconsistency [43] and some confusion [10]. Recent results 322  
on cognitive ageing in Britain are reinforced with these newly uncovered 323  
results: among men both cognitive and physical functions are secularly 324  
improving. Future responses to the challenge of an ageing population [9] 325

by research and policy should carefully consider cohort composition to gain 326

useful insights and craft efficient policy. 327

## Acknowledgments

This work was supported by grants from the Medical Research Council and Economic & Social Research Council (No. G1001375/1), the National Institute of Health Research (No. ES/L001772/1) and the European Union's Horizon 2020 Research and Innovation Programme (No. 668648) to Gindo Tampubolon.

## References

1. Tampubolon G. Cognitive ageing in Great Britain in the new century: Cohort differences in episodic memory. *PLoS ONE*. 2016 12;10(12):1–17.
2. Colcombe S, Kramer AF. Fitness effects on the cognitive function of older adults: A meta-analytic study. *Psychological Science*. 2003;14(2):125–130.
3. Matsubayashi K, Okumiya K, Wada T, Osaki Y, Doi Y, Ozawa T. Secular improvement in self-care independence of old people living in community in Kahoku, Japan. *The Lancet*. 1996;347(8993):60.
4. Dodds RM, Syddall HE, Cooper R, Benzeval M, Deary IJ, Dennison EM, et al. Grip strength across the life course: Normative data from twelve British studies. *PLoS ONE*. 2014 12;9(12):1–15.
5. Tampubolon G. Growing up in poverty, growing old in infirmity: The long arm of childhood conditions in Great Britain. *PLoS ONE*. 2015 12;10(12):1–16.
6. Zaninotto P, Sacker A, Head J. Relationship between wealth and age trajectories of walking speed among older adults: Evidence from the English Longitudinal Study of Ageing. *The Journals of Gerontology Series A: Biological Sciences and Medical Sciences*. 2013;68(12):1525–1531.
7. Sasaki H, Kasagi F, Yamada M, Fujita S. Grip strength predicts cause-specific mortality in middle-aged and elderly persons. *The American Journal of Medicine*. 2007;120(4):337 – 342.

8. Cooper R, Kuh D, Cooper C, Gale CR, Lawlor DA, Matthews F, et al. Objective measures of physical capability and subsequent health: a systematic review. *Age and Ageing*. 2011;40(1):14–23.
9. Christensen K, Doblhammer G, Rau R, Vaupel JW. Ageing populations: the challenges ahead. *The Lancet*. 2009;374(9696):1196–1208.
10. WHO. World Report on Ageing and Health. Geneva: WHO; 2015. Available from: [www.who.int/ageing/publications/world-report-2015/](http://www.who.int/ageing/publications/world-report-2015/).
11. Newman AB. An overview of the design, implementation, and analyses of longitudinal studies on aging. *Journal of the American Geriatrics Society*. 2010;58(S2):S287–S291.
12. Hardy SE, Allore H, Studenski SA. Missing data: A special challenge in aging research. *Journal of the American Geriatrics Society*. 2009;57(4):722–729.
13. Tampubolon G. Delineating the Third age: Joint models of older people’s quality of life and attrition in Britain 2002-2010. *Aging & Mental Health*. 2015;19:576–583. Available from: <http://dx.doi.org/10.1080/13607863.2014.1003279>.
14. Tampubolon G. Trajectories of the healthy ageing phenotype among middle-aged and older Britons, 2004-2013. *Maturitas*. 2016;88(7):9 – 15.

15. Tampubolon G. Repeated systemic inflammation was associated with cognitive deficits in older Britons. *Alzheimer's & Dementia: Diagnosis, Assessment & Disease Monitoring*. 2016;3:1 – 6.
16. Ferrucci L, Corsi A, Lauretani F, Bandinelli S, Bartali B, Taub DD, et al. The origins of age-related proinflammatory state. *Blood*. 2005;105(6):2294–2299.
17. Banks J, Breeze E, Lessof C, Nazroo J, editors. Retirement, health and relationships of the older population in England: The 2004 English Longitudinal Study of Ageing. London: The Institute for Fiscal Studies; 2006.
18. Banks J, Lessof C, Nazroo J, Rogers N, Stafford M, Steptoe A, editors. Financial circumstances, health and well-being of the older population in England: The 2008 English Longitudinal Study of Ageing. London: The Institute for Fiscal Studies; 2010.
19. Banks J, Nazroo J, Steptoe A, editors. The Dynamics of Ageing: Evidence from the English Longitudinal Study of Ageing 2002-2012 Wave 6. London: The Institute for Fiscal Studies; 2014.
20. Lima TAS, Adler AL, Minett T, Matthews FE, Brayne C, Marioni RE, et al. C-reactive protein, APOE genotype and longitudinal cognitive change in an older population. *Age and Ageing*. 2014;43(2):289–292.
21. Sujarwoto S, Tampubolon G. Inflammatory markers and physical performance in middle-aged and older people in Indonesia. *Age and Ageing*. 2015;44(4):610–615.

22. Reiner AP, Aragaki AK, Gray SL, Wactawski-Wende J, Cauley JA, Cochrane BB, et al. Inflammation and thrombosis biomarkers and incident frailty in postmenopausal women. *The American Journal of Medicine*. 2009;122(10):947 – 954.
23. Cohen HJ, Harris T, Pieper CF. Coagulation and activation of inflammatory pathways in the development of functional decline and mortality in the elderly. *The American Journal of Medicine*. 2003;114(3):180 – 187. Available from: <http://www.sciencedirect.com/science/article/pii/S0002934302014845>.
24. Schaap LA, Pluijm SMF, Deeg DJH, Visser M. Inflammatory markers and loss of muscle mass (sarcopenia) and strength. *The American Journal of Medicine*. 2006;119(6):526.e9 – 526.e17. Available from: <http://www.sciencedirect.com/science/article/pii/S0002934305010545>.
25. Marmot M, Banks J, Blundell R, Lessof C, Nazroo J, editors. Health, wealth and lifestyles of the older population in England: The 2002 English Longitudinal Study of Ageing. London: The Institute for Fiscal Studies; 2003.
26. Banks J, Breeze E, Lessof C, Nazroo J, editors. Living in the 21st century: older people in England: The 2006 English Longitudinal Study of Ageing. London: The Institute for Fiscal Studies; 2008.
27. Kröger H, Fritzell J, Hoffmann R. The association of levels of and decline in grip strength in old age with trajectories of life course occupational position. *PLoS ONE*. 2016;p. e0155954.

28. Frederiksen H, Hjelmberg J, Mortensen J, McGue M, Vaupel JW, Christensen K. Age trajectories of grip strength: Cross-sectional and longitudinal data among 8,342 Danes aged 46 to 102. *Annals of Epidemiology*. 2006;16(7):554–562. Available from: <http://dx.doi.org/10.1016/j.annepidem.2005.10.006>.
29. Andersen-Ranberg K, Petersen I, Frederiksen H, Mackenbach JP, Christensen K. Cross-national differences in grip strength among 50+ year-old Europeans: results from the SHARE study. *European Journal of Ageing*. 2009;6(3):227–236.
30. Spruit MA, Sillen MJH, Groenen MTJ, Wouters EFM, Franssen FME. New normative values for handgrip strength: Results from the UK Biobank. *Journal of the American Medical Directors Association*. 2013;14(10):775.e5 – 775.e11.
31. Kenny RA, Coen RF, Frewen J, Donoghue OA, Cronin H, Savva GM. Normative values of cognitive and physical function in older adults: Findings from The Irish Longitudinal Study on Ageing. *Journal of the American Geriatrics Society*. 2013;61:S279–S290.
32. Hernán MA, Brumback B, Robins JM. Marginal structural models to estimate the causal effect of zidovudine on the survival of HIV-positive men. *Epidemiology*. 2000;11(5):561–570.
33. Cole SR, Hernán MA, Margolick JB, Cohen MH, Robins JM. Marginal structural models for estimating the effect of highly active antiretroviral therapy initiation on CD4 cell count. *American Journal of Epidemiology*. 2005;162(5):471–478.



34. Cole SR, Hernán MA. Constructing inverse probability weights for marginal structural models. *American Journal of Epidemiology*. 2008;168(6):656–664.
35. Gottesman RF, Rawlings AM, Sharrett AR, Albert M, Alonso A, Bandeen-Roche K, et al. Impact of differential attrition on the association of education with cognitive change over 20 years of follow-up: The ARIC Neurocognitive Study. *American Journal of Epidemiology*. 2014;179(8):956–966.
36. Vermunt JK, Magidson J. Upgrade Manual for Latent GOLD 5.1. Belmont, MA: Statistical Innovations; 2016.
37. Cutler DM. Declining disability among the elderly. *Health Affairs*. 2001;20(6):11–27.
38. Deaton A. *The Great Escape: health, wealth, and the origins of inequality*. Princeton, NJ: Princeton University Press; 2013.
39. Marmot M. *The Health Gap: The Challenge of an Unequal World*. London: Bloomsbury; 2015.
40. Hamer M, Molloy GJ. Association of C-reactive protein and muscle strength in the English Longitudinal Study of Ageing. *AGE*. 2009;31(3):171–177. Available from: <http://dx.doi.org/10.1007/s11357-009-9097-0>.
41. Franceschi C, Campisi J. Chronic inflammation (Inflammaging) and its potential contribution to age-associated diseases. *The Journals of Gerontology Series A: Biological Sciences and Medical Sciences*. 2014;69(Suppl 1):S4–S9.

42. Degens H. The role of systemic inflammation in age-related muscle weakness and wasting. *Scandinavian Journal of Medicine & Science in Sports*. 2010;20(1):28–38.
43. Beard JR, Officer A, de Carvalho IA, Sadana R, Pot AM, Michel JP, et al. The World report on ageing and health: a policy framework for healthy ageing. *The Lancet*. 2015;387(10033):2145–2154.
